# Supplementary material for: A Systematic Review Protocol: Barriers and Facilitators of Breast Cancer Screening Among Women in Sub-Saharan Africa.
Source: Research Square preprint supplement (doi:10.21203/rs.3.rs-734539/v1), 2021-08-02
Supplement: Supplementary file 1 [file 27a8b653c131ea040b501fff.docx]

**Data extraction sheet**

| **Authorship and publications information** | | | | | **BC screening method** | | | **Barriers to BC screening** | **Facilitators to BC screening** |
| --- | --- | --- | --- | --- | --- | --- | --- | --- | --- |
| **Author/year** | **Country** | **Study aim** | **Study design** | **Participants and sample size** | **CBE** | **MM** | **BSE** | **Key findings** | **Key findings** |
|  |  |  |  |  |  |  |  |  |  |
|  |  |  |  |  |  |  |  |  |  |
|  |  |  |  |  |  |  |  |  |  |
|  |  |  |  |  |  |  |  |  |  |
|  |  |  |  |  |  |  |  |  |  |
|  |  |  |  |  |  |  |  |  |  |

Legend: BC=breast cancer, BSE=breast self-examination, CBE=Clinical breast examination, MM=Mammography, X=either CE, MM, BSE.
